1  
2  
3  
4 1 Elucidating the regulation of glucose tolerance through the interaction between the reaction product and  
5  
6 2 active site pocket residues of a  $\beta$ -glucosidase from *Halothermothrix orenii*  
7  
8 3

9 4 Sushant K Sinha<sup>1</sup>, Shibashis Das<sup>1</sup>, Sukanya Konar<sup>2</sup>, Pradip Kr. Ghorai<sup>2,\*</sup>, Rahul Das<sup>3,4,\*</sup>, Supratim  
10  
11 5 Datta<sup>1,4,5,6,\*</sup>  
12

13 6 <sup>1</sup>Protein Engineering Laboratory, Department of Biological Sciences, Indian Institute of Science  
14  
15 7 Education and Research Kolkata, Mohanpur, West Bengal  
16

17 8 <sup>2</sup>Department of Chemical Sciences, Indian Institute of Science Education and Research Kolkata,  
18  
19 9 Mohanpur, West Bengal  
20

21 10 <sup>3</sup>Department of Biological Sciences, Indian Institute of Science Education and Research Kolkata,  
22  
23 11 Mohanpur, West Bengal  
24

25 12 <sup>4</sup>Center for the Advanced Functional Materials, Indian Institute of Science Education and Research  
26  
27 13 Kolkata, Mohanpur, West Bengal  
28

29 14 <sup>5</sup>Center for the Climate and Environmental Sciences, Indian Institute of Science Education and Research  
30  
31 15 Kolkata, Mohanpur, West Bengal  
32

33 16  
34 17 <sup>6</sup>Current address: Department of Energy and Environmental Engineering, CSIR-Indian Institute of  
35  
36 18 Chemical Technology, Hyderabad. 500 007, India  
37  
38 19

39  
40 20  
41  
42 21 \*Correspondence may be addressed to: [supratim@iiserkol.ac.in](mailto:supratim@iiserkol.ac.in), [rahul.das@iiserkol.ac.in](mailto:rahul.das@iiserkol.ac.in), or  
43  
44 22 [pradip.ghorai@gmail.com](mailto:pradip.ghorai@gmail.com)  
45

46 23  
47  
48 24 Keywords

49  
50 25 Glucose tolerance;  $\beta$ -glucosidase; protein engineering  
51  
52  
53  
54  
55  
56

57  
58  
59 1 **Abstract**  
60

61 2  $\beta$ -glucosidase catalyzes the hydrolysis of  $\beta$ -1,4 linkage between two glucose molecules in cello-  
62 3 oligosaccharides and is prone to inhibition by the reaction product glucose. Relieving the glucose inhibition  
63 4 of  $\beta$ -glucosidase is a significant challenge. Towards the goal of understanding how glucose interacts with  
64 5  $\beta$ -glucosidase, we expressed in *Escherichia coli*, the Hore\_15280 gene encoding a  $\beta$ -glucosidase in  
65 6 *Halothermothrix orenii*. Our results show that the enzyme is glucose tolerant, and its activity stimulated in  
66 7 the presence of up to 0.5 M glucose. NMR analyses show the unexpected interactions between glucose and  
67 8 the  $\beta$ -glucosidase at lower concentrations of glucose that however does not lead to enzyme inhibition. We  
68 9 identified non-conserved residues at the aglycone-binding and the gatekeeper site and show that increased  
69 10 hydrophobicity at the pocket entrance and a reduction in steric hindrances are critical towards enhanced  
70 11 substrate accessibility and significant improvement in activity. Analysis of structures and in combination  
71 12 with molecular dynamics simulations show that glucose increases the accessibility of the substrate by  
72 13 enhancing the structural flexibility of the active site pocket and may explain the stimulation in specific  
73 14 activity up to 0.5 M glucose. Such novel regulation of  $\beta$ -glucosidase activity by its reaction product may  
74 15 offer novel ways of engineering glucose tolerance.  
75  
76  
77  
78  
79  
80  
81  
82  
83  
84  
85  
86  
87  
88  
89  
90  
91  
92  
93  
94  
95  
96  
97  
98  
99  
100  
101  
102  
103  
104  
105  
106  
107  
108  
109  
110  
111  
112

113  
114  
115 **1. Introduction**  
116

117 2 Microbes express the enzymes required for the conversion of polysaccharides in lignocellulosic biomass to  
118 3 produce sugars. Through a fermentative process, the sugars can then be converted to biofuels by the same  
119 4 or other microbes. The enzymes that break down the polysaccharides into fermentable sugars are  
120 5 collectively known as cellulase. The minimum set of required enzymes in this cellulase mix  
121 6 (cellobiohydrolase, endoglucanase, and  $\beta$ -glucosidase) work synergistically to deconstruct the biomass [1-  
122 7 3]. Endoglucanase (EC 3.2.1.4) randomly cleave the  $\beta$ -1,4 glycosidic linkages of cellulose;  
123 8 cellobiohydrolase (EC 3.2.1.91 and 3.2.1.176) attack the cellulose chain ends to produce cellobiose (a dimer  
124 9 of glucose linked by a  $\beta$ -1,4 glycosidic bond); and  $\beta$ -glucosidase (EC 3.2.1.21) hydrolyze cellobiose into  
125 10 two molecules of glucose. The inhibition of cellobiose hydrolysis by  $\beta$ -glucosidase reaction product glucose  
126 11 is recognized as the limiting step in the conversion of lignocellulosic biomass to sugars [4]. The separate  
127 12 hydrolysis and fermentation (SHF) methodology, a commonly used biofuel production strategy is prone to  
128 13 product inhibition. Another efficient and economic cellulose hydrolysis setup under high-gravity  
129 14 fermentation also requires a high biomass loading and enzymes tolerant to the molar concentrations of  
130 15 glucose produced during the reaction [5]. Relieving glucose inhibition would result in the rapid increase  
131 16 in hydrolysis activity by the  $\beta$ -glucosidase and more economical biomass hydrolysis [6]. Relieving this  
132 17 product inhibition is thus a significant challenge.

133 18 The inhibition constant ( $K_{i,app}$ ) of glucose on the chromogenic model  $\beta$ -glucosidase substrate, *p*-  
134 19 nitrophenyl D-glucopyranoside (*p*NPGlc), spans many orders of magnitude with a few naturally occurring  
135 20  $\beta$ -glucosidase with  $K_{i,app}$  in the molar range [7-12]. The glucose-induced inhibition has been attributed to a  
136 21 broader active site pocket entrance that facilitates increased glucose access to the enzyme active site [13].  
137 22 Put another way, glucose tolerance was proposed to be a consequence of a narrower and deeper active site  
138 23 pocket that impedes access to the active site [13]. These observations do not, however, explain the ability  
139 24 of the enzyme pocket to distinguish between the reaction product glucose and the substrate cellobiose. Our  
140 25 sequence comparisons with other highly glucose tolerant  $\beta$ -glucosidase such as O08324, A0A0F7KKB7,  
141 26 and Q8T0W7 suggest that many of the residues previously implicated for glucose tolerance are non-  
142 27 conserved and therefore those specific residues may not play a role in glucose tolerance [14-16].

143 28 Therefore, we have embarked on a program to understand the role of the active site pocket in glucose  
144 29 tolerance of  $\beta$ -glucosidase and engineering glucose tolerance of low glucose tolerant enzymes. In this study,  
145 30 we used a  $\beta$ -glucosidase (B8CYA8) from the thermophilic and halophilic bacteria *Halothermothrix orenii*  
146 31 [17]. It was previously reported that B8CYA8 efficiently converts lactose to different transglycosylated  
147 32 products and hydrolyzes cellobiose to glucose [14, 18, 19]. Here we report that B8CYA8 is tolerant to high  
148 33 concentrations of glucose. Unexpectedly, we observed by NMR-based experiments that the enzyme

169  
170  
171 1 interacts with glucose, even at low concentrations. Saturation-transfer difference (STD) NMR experiment  
172 2 verified that the glucose interaction with the B8CYA8 residues does not affect the enzyme. While the  
173 3 glucose may be expected to sterically hinder the access of substrate and inhibit B8CYA8 activity, the  
174 4 enzyme activity was stimulated by glucose. We identified conserved and non-conserved residues spanning  
175 5 the enzyme active site pocket that affects glucose tolerance to reveal the importance of amino acid residues  
176 6 across glycone, aglycone and gatekeeper sites of B8CYA8. A combination of beneficial mutants generated  
177 7 highly active variants of B8CYA8. Finally, based on our kinetic studies, structural analyses and molecular  
178 8 dynamics (MD) simulations, we propose a model to describe how glucose may regulate the stimulation and  
179 9 inhibition of the enzyme.  
180  
181  
182  
183  
184  
185

## 186 11 **2. Methods**

187 12 **2.1. Chemicals:** All chemicals used were of reagent grade. Restriction endonucleases, DNA ligase, and  
188 13 DNA polymerase were purchased from NEB (MA, USA). Primers were synthesized by Xcelaris  
189 14 (India). All chromogenic substrates and chemicals were purchased from Sigma-Aldrich. The active  
190 15 fractions post-purification was pooled and concentrated using 30 kDa cut-off size membranes of  
191 16 Amicon-Ultra-15 (Merck Millipore, Bangalore, India). Plasmid purification and gel purification kits  
192 17 were obtained from Qiagen (Hilden, Germany).

193 18 **2.2. Bacterial strains, culture conditions, and plasmids:** The synthetic gene corresponding to the  $\beta$ -  
194 19 glucosidase from *H. orenii* was constructed (BankIt1930137BG\_Halotherm KU867899) as reported  
195 20 previously and expressed in *Escherichia coli* Top 10F' cells (Life Technologies, La Jolla, CA) [14].  
196 21 The cells were centrifuged at 4000  $\times g$  for 10 min at 4 °C and the pellet stored at -20 °C until purification  
197 22 of the protein.

198 23 **2.3. Primer design, PCR, and cloning:** All mutants were generated via a mega primer-based polymerase  
199 24 chain reaction (PCR) mutagenesis strategy [20]. Briefly, three primers were used - a template specific  
200 25 forward and reverse primer and the mutant primer either towards the forward or reverse direction,  
201 26 depending on the position of the mutation in the gene (Supplementary file, Table S7). The first PCR  
202 27 was run using the mutant primer and template-specific primer to generate the megaprimer containing  
203 28 the mutation. The megaprimer was extended during the second PCR by another sequence-specific  
204 29 primer. While the single mutants were generated from the wild-type DNA, the template containing  
205 30 single mutations were used to generate the double mutants. Primers were designed using OligoAnalyzer  
206 31 (IDT Technology) and ApE (ApE Plasmid Editor, version 2.0.49 by M. Wayne Davis). The DNA  
207 32 sequences encoding the mutants were obtained from both strands by automated DNA sequencing at the  
208 33 IISER Kolkata sequencing facility.

225  
226  
227 1 **2.4. Protein expression and purification:** B8CYA8 and mutants were purified using a protocol as detailed  
228 2 earlier, and purity was confirmed by 10 % SDS-PAGE [14]. The protein concentrations were  
229 3 determined by measuring the absorbance at 280 nm and using the extinction coefficient for respective  
230 4 enzyme variants calculated using the modified Edelhoch and Gill/Von Hippel methods on ExPASy  
231 5 (<http://web.expasy.org/protparam/>).

232 6 **2.5. Saturation transfer difference (STD) NMR of protein B8CYA8 and ligand glucose:** The sample  
233 7 for NMR experiment was prepared in 20 mM potassium phosphate buffer, pH 7.0, and 99.9 % D<sub>2</sub>O,  
234 8 final B8CYA8 concentration was at 90 μM and glucose concentration at 20 mM. NMR spectra were  
235 9 recorded on a Bruker AV 500 spectrometer at 298 K. The saturation transfer difference (STD) spectra  
236 10 were recorded by setting the on- and off-resonance irradiation at -1 ppm and 30 ppm, respectively [21].  
237 11 All spectra were recorded with 256 scans, four dummy scans, a spectral width of 8012 Hz, and 8 K  
238 12 points. The residual protein background signal was suppressed with the 30 ms T1ρ filter. In determining  
239 13 the ligand signal arising from direct saturation of ligand signals close to on-resonance pulse, a control  
240 14 sample with ligand only was used. All spectra were processed and analyzed with Topspin 3.5 (Bruker  
241 15 Biospin Corporation, MA, USA).

242 16 **2.6. Enzyme activity assays:** The pH dependence of B8CYA8 mutants was determined by measuring  
243 17 enzyme specific activities on *p*NPGlc in the pH range of 5.0 to 8.0 at 70 °C, after incubating the enzyme  
244 18 overnight at 4 °C in each buffer. The effect of temperature on enzyme activity for *p*NPGlc was  
245 19 measured between 55 to 80 °C while incubating in McIlvaine buffer, pH 6.5. Based on the initial rate  
246 20 measured, the amount of enzyme to be used, and the assay time was optimized. The specific activity of  
247 21 the mutants was assayed at the  $T_{opt}$  and  $pH_{opt}$  of each enzyme as per previously published protocol,  
248 22 using saturating concentrations of substrates, *p*NPGlc, and cellobiose (Clb) [22]. Clb hydrolysis  
249 23 produces two molecules of glucose and the calibration curve used was based on the glucose produced.

250 24 **2.7. Kinetic Analysis of B8CYA8:** The kinetic parameters of all the mutants were determined at various  
251 25 concentrations, ranging between 0.5 mM to 100 mM, of substrates *p*NPGlc and Clb as previously  
252 26 reported [14]. GraphPad PRISM version 7.0 (GraphPad Software, La Jolla, CA) was used to calculate  
253 27 all kinetic constants by a non-linear regression fit of the Michaelis- Menten equation.

254 28 **2.8. Thermostability, half-life, residual specific activity assay, and  $T_m$ :** Enzymes were incubated in 100  
255 29 mM HEPES buffer, pH 7.1 for wild-type enzyme, and McIlvaine buffer at  $pH_{opt}$  of each mutant at 70  
256 30 °C. At regular time intervals, aliquots were taken out, centrifuged, and assayed for the residual specific  
257 31 activity. Half-life times were determined using the equation for a one-phase exponential decay in  
258 32 GraphPad PRISM. The residual specific activity of enzymes in the presence of glucose was determined  
259 33 at 70 °C upon 24 h incubation in the buffer containing 1 M glucose without substrate. Then the samples

281  
282  
283  
284 1 were cooled down, and specific residual activity was measured with 20 mM *p*NPGlc at the respective  
285 2 optimum conditions. For each sample, blanks without enzyme were subtracted for any background  
286 3 absorbance.

288 4 **2.9. Measurement of synergy:** The synergy of B8CYA8 and its mutants with commercial cellulase derived  
289 5 from *Trichoderma viride* (Sigma-Aldrich, St. Louis, USA) was measured on Avicel. The 200  $\mu$ L of  
290 6 reaction contained 20  $\mu$ g of cellulase, 3  $\mu$ g of B8CYA8 or mutants, and 15 % (w/v) Avicel, in a buffer  
291 7 of pH 5.0. Sweet almond  $\beta$ -glucosidase (SRL, Chennai, India) was used as a control for B8CYA8. The  
292 8 reaction time course was followed until two hours at 37 °C. The reaction was terminated by heating at  
293 9 95 °C for 10 min, and the glucose generated quantitated using a GOD-POD assay kit (Sigma-Aldrich,  
294 10 St. Louis, USA).

298 11 **2.10. Molecular Dynamics Simulations:** The X-ray crystallographic structure of the  $\beta$ -glucosidase was  
299 12 obtained from the protein databank (PDB: 4PTX)[18]. The energy minimized protein molecule  
300 13 (B8CYA8) was kept at the center of a cubic simulation box 120 Å long and then solvated with water.  
301 14 We used the TIP3P water model in all of our simulations [23]. Glucose molecules were added by using  
302 15 PACKMOL to obtain glucose concentrations [24]. All the potential parameters were obtained from the  
303 16 CHARMM36 force field. The simulations were performed by NAMD-2.9 simulation tools [25-27]. By  
304 17 taking initial configurations at different glucose concentrations, the conjugate gradient method was  
305 18 applied for 300000 steps to remove all energetically unfavorable contacts. The starting configurations  
306 19 were equilibrated for 3.0 ns in the NPT ensemble to fix the simulation box length. In NPT simulations,  
307 20 Noose-Hoover thermostat and barostat coupling constants were taken to be 0.5 ps and 2.0 ps,  
308 21 respectively [28, 29]. The pressure was kept constant at 1.0 atm. After the simulation box length was  
309 22 fixed, we equilibrated the system for 5.0 ns in the NVT ensemble. To analyze different system  
310 23 properties, a 50 ns production run was performed in the NVT ensemble. The chosen system temperature  
311 24 was kept constant by using the damping coefficient ( $\gamma$ ) of 1.0  $\text{ps}^{-1}$  by Langevin dynamics. Long-range  
312 25 interactions are handled by the particle mesh Ewald (PME) method with real space cut-off of 16 Å and  
313 26 2 Å pair list cut-off [30-32]. We used 1- 4 scaling factor in our simulations. The time step was 1.0 fs,  
314 27 and all the properties were computed from the trajectories stored at an interval of 4.0 ps during the  
315 28 production run.

### 325 29 **3. Results**

326 30 **3.1. The effect of glucose on B8CYA8 specific activity:** We assayed enzyme-specific activity in the  
327 31 presence of exogenously added glucose and observed that the presence of 0.5 M to 0.75 M glucose,  
328 32 stimulated B8CYA8 specific activity by 1.7-fold, unlike the typical enzymatic product inhibition  
329 33 profiles. Though further addition of glucose decreased B8CYA8 activity, around 125 % specific

337  
338  
339 1 activity was retained in the presence of 1.5 M glucose (Fig. 1). Glucose has been commonly known to  
340 2 be a competitive inhibitor of  $\beta$ -glucosidase, wherein the apparent  $K_m$  increases with increasing glucose  
341 3 concentration without any change in  $k_{cat}$ . However, in B8CYA8, both stimulation and inhibition are at  
342 4 play as both  $K_m$  and  $k_{cat}$  increases with an increase in glucose concentration (Supplementary file, Table  
343 5 S1).  
344 6

345 7 The crystal structure of B8CYA8 complexed with glucose (PDB: 4PTX), show glucose trapped in  
346 8 the glycone binding region (-1 subsite) and occupying the substrate-binding site [18]. The site of  
347 9 glucose binding could indicate a competitive inhibition of B8CYA8 by glucose. Alternately, the  
348 10 presence of glucose could have been an artifact of the crystallization trials. Since the authors had soaked  
349 11 the crystal with a non-hydrolysable substrate, the glucose could have been trapped due to crystal  
350 12 packing. To ascertain if glucose indeed interacts with B8CYA8 in solution, we probed the glucose  
351 13 enzyme interaction by NMR.  
352 14

### 353 15 **3.2. Interaction of glucose and B8CYA8 by Saturation-transfer difference (STD) NMR experiment:**

354 16 The interaction of glucose with B8CYA8 was probed by 1D STD-based NMR experiments [21]. Fig.  
355 17 2b shows the one-dimensional reference spectra of glucose, STD spectra of glucose alone as a control,  
356 18 and the STD spectra of glucose in the presence of B8CYA8. In the sample containing the protein and  
357 19 glucose, we could observe the 1D- NMR signal of the glucose when the on-resonance pulses were set  
358 20 at the aliphatic region of the protein, enabling the transfer of the magnetization to glucose (Fig 2b). In  
359 21 the control experiment, the STD spectra of only glucose did not produce any signal for glucose. The  
360 22 transfer of magnetization to glucose suggests that the glucose specifically interacts with B8CYA8 in  
361 23 solution.  
362 24

363 25 In the reference spectra, except for H1, all the resonances for the protons connected to the individual  
364 26 carbon atoms of glucose was observed. In the crystal structure of B8CYA8 complexed with glucose,  
365 27 the ligand-binding surface is made of predominantly aromatic amino acid residues [18]. The hydrogen  
366 28 atoms linked to C1, C3, C5, and C6 carbon of glucose make close contact with the residues in the  
367 29 ligand-binding surface (Supplementary file, Fig S1). If the glucose in solution similarly interacts with  
368 30 B8CYA8 as in the crystal structure, saturation of the protein would result in the efficient transfer of  
369 31 magnetization to the protons coupled to C1, C3, C5, and C6 carbon of glucose. Fig. 2b shows the  
370 32 transfer-NOE peak for the H3, H5, and H6 protons of glucose, suggesting a direct interaction between  
371 33 glucose and the protein. Transfer-NOE peaks for the H2 and H4 proton of glucose was not observed.  
372 34 While these observations suggest an agreement between glucose binding in solution and the crystal  
373 35 structure, the stimulation in B8CYA8 specific activity cannot be explained.  
374 36  
375 37  
376 38  
377 39  
378 40  
379 41  
380 42  
381  
382  
383  
384  
385  
386  
387  
388  
389  
390  
391  
392

393  
394  
395 **3.3. Glucose stimulation and inhibition is not an osmolyte effect or due to transglycosylation:** It may

396  
397 be speculated that the glucose-induced stimulation could be due to glucose acting as an osmolyte.  
398  
399 Therefore, we looked at the specific activity of the enzyme in the presence of another sugar, sucrose.  
400  
401 As shown in (Supplementary file, Fig. S2), there was a slight increase in  $k_{cat}$  by sucrose, but there was  
402  
403 no significant stimulation as observed with glucose. Most importantly, there was no change in  $K_m$  in  
404  
405 the presence of sucrose as opposed to the 1.85 to 13-fold  $K_m$  increase in the presence of glucose. While  
406  
407 an osmolyte effect cannot be ruled out in the presence of other sugars, our results indicate that glucose  
408  
409 and sucrose do not have any significant osmolyte effects. Since an increase in enzyme activity in the  
410  
411 presence of glucose has been previously ascribed to transglycosylation, we tried to detect the longer  
412  
413 chain transglycosylated products in the presence of different concentrations of substrate and glucose  
414  
415 and compared to the previously reported transglycosylation of lactose by B8CYA8 [18, 33]. As can be  
416  
417 seen (Supplementary file, Fig. S3), no transglycosylated product was detected in the presence of  
418  
419 glucose, and thus, we could rule out its role in the glucose tolerance of B8CYA8. To further understand  
420  
421 the mechanism of glucose-dependent regulation, the enzyme sequence and structure was probed.

422 **3.4. The basis of mutant selection:** B8CYA8 is a GH1  $\beta$ -glucosidase and has a typical  $(\alpha/\beta)_8$  TIM barrel  
423  
424 fold structure with catalytic residues (Glu166 and Glu354) located deep inside the deep active site  
425  
426 pocket. This pocket can be binned into three regions, namely, glycone binding site (-1 subsite),  
427  
428 aglycone binding site (+1 subsite), and gatekeeper region (Supplementary file, Fig. S4). Among  $\beta$ -  
429  
430 glucosidase, the gatekeeper residues at the entrance to the deep active site pocket are mostly non-  
431  
432 conserved (Fig. 3a). Gatekeeper residues have been suggested to play essential roles in the dynamics  
433  
434 of the substrate influx and product efflux [13]. Thus, residues with a bulkier side chain might be  
435  
436 expected to sterically slow down the substrate influx and efflux dynamics and affect catalysis. The  
437  
438 hydrophilic residues at the aglycone and gatekeeper regions could help glucose stick to the active site  
439  
440 pocket, leading to inhibition of specific activity. To test this hypothesis, we made mutations across all  
441  
442 the regions (Supplementary file, Fig. S4) of the active site pocket, as summarized in (Supplementary  
443  
444 file, Table S2), and shown in Fig. 3b. The size of mutated residues was compared using van der Waals  
445  
446 volume, and the hydrophobicity was analyzed through the hydrophathy index [34-36].

447 **3.4.1. Glycone binding region:** The glycone binding regions in the active site pocket of  $\beta$ -glucosidase are  
448  
449 typically well-conserved [37-39], as can be seen in Fig. 3a, Trp122 in the glycone binding region  
450  
451 is conserved across most of the glucose tolerant  $\beta$ -glucosidase except in O08324 (the enzyme  
452  
453 retains 100 % specific activity up to 4 M Glc) wherein a Phe is located at the equivalent position  
454  
455 [15]. W122F mutant was constructed to understand the effect of a further increase in  
456  
457 hydrophobicity at the glycone-binding region.



449  
450  
451 1 **3.4.2. Aglycone binding region:** At the aglycone region, the residue equivalent to V169 in glucose tolerant  
452 2  $\beta$ -glucosidase is alternately occupied by Cys and Val (Fig. 3a). We had previously reported that the  
453 3 substitution of Val to Cys increased B8CYA8 specific activity 1.7-fold [14]. However, glucose  
454 4 tolerance of wild-type or the mutant had remained unexplored.

455 5 **3.4.3. Gatekeeper region:** The gatekeeper residues W168, E173, H180, I246, and A410 were selected to  
456 6 understand the effect of hydrophobicity and steric by substitution with smaller side-chain, polar  
457 7 side-chain and hydrophobic side-chain residues (Fig. 2a, Fig. 3b).

458 8 **3.5. Effect of mutations on B8CYA8 specific activity in the absence of glucose:** In order to determine  
459 9 the kinetics of the mutants on the chromogenic substrate *p*NPGlc and natural substrate cellobiose, the  
460 10 temperature and pH optima ( $T_{opt}$ ,  $pH_{opt}$ ) of the mutants on each of the substrates were measured (Table  
461 11 1). All the mutants showed small changes in  $pH_{opt}$  in the range of 0.2 -1, and a 2 to 5 °C change in  $T_{opt}$   
462 12 in comparison to the wild-type (Table 1). These subtle differences may be due to the location of  
463 13 mutations in the active site pocket, with small changes in interaction with the solvent molecules leading  
464 14 to change in  $pH_{opt}$  and similar changes in interaction with substrate molecules leading to small changes  
465 15 in  $T_{opt}$  [40, 41]. W122F, V169C, E173L, E173A, H180F, I246A, A410F, and A410K showed higher  
466 16 turnover with *p*NPGlc (Supplementary file, Table S1). While the higher specific activity of V169C,  
467 17 I246A, and V169C/I246A mutants was previously reported [14], the turnover numbers of A410K,  
468 18 V169C/E173L, and V169C/E173L/I246A increased by 17 %, 25 %, and 116 % respectively compared  
469 19 to wild-type B8CYA8 (Table 2).

470 20 **3.6. Effect of mutations on B8CYA8 specific activity in the presence of glucose:** The specific activity  
471 21 and kinetics of the B8CYA8 mutants were measured in the presence of exogenously added glucose  
472 22 (Supplementary file, Fig. S5). The direct interaction of the glucose with the enzyme possibly affects its  
473 23  $K_m$ . This variation of  $K_m$  of the mutants in the presence of 0 - 1.5 M glucose allowed us to bin the  
474 24 B8CYA8 mutants across two groups. In the first group, we considered mutants wherein we saw an  
475 25 increase in the fold-change in  $K_m$  and a decrease in glucose tolerance (Fig. 4a), and in the second group  
476 26 (Fig. 4b), we bin mutants wherein the glucose tolerance increased as reflected in the decrease in fold-  
477 27 change of  $K_m$  upon comparison to the wild-type. Thus, W168A/R, H180K, I246A, and A410K (Fig.  
478 28 4a) showed decreased glucose tolerance while W122F, E173L/A, H180F and A410F (Fig. 4b) show  
479 29 increase in tolerance and stimulation (Supplementary file, Table S1). While a pattern of a decrease in  
480 30 fold-change of  $K_m$  and increase in tolerance when the residues were replaced by a more hydrophobic  
481 31 amino acid (Fig. 4b) is evident, the pattern of increase in fold-change in  $K_m$  in Fig. 4a is less so. The  
482 32 enzyme specificity ( $k_{cat}/K_m$ ) of the improved variants are shown in Fig. 5a. Let us now look at the effect  
483 33 on the different regions of the active site pocket.

505  
506  
507 1 **3.6.1. Effect of glucose at the gatekeeper region:** Amongst the gatekeeper residues, W168R is  
508 2 drastically inhibited, as seen by a 44-fold increase in  $K_m$  at 1.5 M glucose. This increase in  $K_m$  in  
509 3 the presence of glucose is much higher compared to only a 17-fold increase in the wild-type. As a  
510 4 result, the  $k_{cat}/K_m$  of the mutant decreased 27-fold compared to only 7.6-fold of the wild type.  
511 5 Mutation to a smaller and hydrophobic Ala in W168A also led to an increase in glucose inhibition,  
512 6 as seen from a comparatively smaller increase in  $K_m$  and  $k_{cat}/K_m$ . At position 173, E173L and E173A  
513 7 were constructed to increase hydrophobicity, and both showed an increase in glucose tolerance.  
514 8 The  $K_m$  fold change was only 3.4 and 4.0 at 1.5 M glucose, respectively, and much less than in wild-  
515 9 type. The reduction in enzyme efficiency,  $k_{cat}/K_m$ , was only 1.4-fold for E173L and 1.9-fold for  
516 10 E173A at 1.5 M glucose. In H180F, substitution by the more hydrophobic Phe increased glucose  
517 11 tolerance even higher, with 100 % specific activity retained at 2 M glucose. The H180K mutant  
518 12 showed no stimulation, and its specific activity was only 40 % at 2 M glucose. The  $k_{cat}/K_m$  of H180F  
519 13 decreased only 3.6-fold while the decrease for H180K was nearly 10-fold at 1.5 M glucose. In the  
520 14 I246A mutant, where the hydrophobicity and residue size was decreased, less stimulation and  
521 15 higher inhibition were observed. Here the sterics probably play a more significant role in glucose  
522 16 inhibition.

523 17 **3.6.2. Effect of Glc at the aglycone binding site:** At the aglycone binding site, the mutant V169C show  
524 18 negligible stimulation in the presence of glucose and its specific activity start decreasing beyond  
525 19 0.75 M glucose, leading to inhibition at low glucose concentration.

526 20 **3.6.3. Effect of Glc at the glycone binding site:** At the conserved glycone binding site,  $K_m$  of W122F in  
527 21 the absence of exogenous glucose is 5-fold higher than in WT, but in the presence of glucose, the  
528 22 apparent  $K_m$  first decreases and then starts to increase with glucose concentrations with a net 3-fold  
529 23 increase in  $K_m$  at 1.5 M glucose.

530 24 To verify that the activity and stability increases in the single mutants were additive, the  
531 25 V169C/E173L double mutant and V169C/E173L/I246A triple mutant was constructed. Though the  
532 26 initial  $K_m$  of the combined mutants V169C/E173L and V169C/E173L/I246A is high, there is only  
533 27 a 3-fold change in  $K_m$  in the presence of 1.5 M glucose and a 50 % increase in  $k_{cat}/K_m$ . Both mutants  
534 28 show higher specific activity, glucose tolerance, and kinetic stability than wild-type.

535 29  
536 30 **3.7. Effect of glucose on half-life and thermostability:** The half-life of most of the mutants as well as the  
537 31 residual specific activity upon incubation in 1 M glucose (for 24 h at 70 °C) showed an increase in  
538 32 kinetic stability compared to wild-type (Supplementary file, Table S3). Notably, I246A in the presence  
539 33 of 1 M glucose retained more than 60 % of its specific activity after 24 h (Supplementary file, Table

561  
562  
563 1 S3). The double and triple mutant containing V169C mutation was highly active, together the  
564 2 V169C/E173L/I246A had the highest increase in residual specific activity, almost 1.9-fold higher at  
565 3 1 M glucose, compared to wild-type (Supplementary file, Table S3) and (Fig. 5b) These observations  
566 4 are in line with our previous reports when we showed that the  $\beta$ -glucosidase reaction product glucose  
567 5 improved the half-life and the kinetic stability of  $\beta$ -glucosidase, H0HC94 [22] and O08324 [15].  
568 6 B8CYA8 and all its mutants show elevated melting temperature (Supplementary file, Table S4) with  
569 7 increasing concentrations of glucose, as reported previously [15, 22]. The increase was about 4-5 °C in  
570 8 the presence of the 0.5 M glucose, and 6-7 °C in 1 M glucose (Supplementary file, Table S4), and  
571 9 indicated the benefits of glucose accumulation during large-scale high biomass loading saccharification  
572 10 reactions.

578 11 **3.8. Computational studies on the effect of glucose:** To further understand the role of enzyme dynamics  
579 12 in glucose tolerance, if any, we looked at the average temperature factor (B-factor). The higher overall  
580 13 B-factor of glucose bound to B8CYA8 (4PTX) compared to thiocellobiose (4PTV), or 2-deoxy-2-  
581 14 fluoro- $\alpha$ -D-glucopyranose (4PTW) bound enzyme suggests that addition of glucose introduces  
582 15 enhanced structural flexibility to B8CYA8 (Fig. 6a). Molecular Dynamics (MD) simulations (Fig. 6  
583 16 b,c,d) confirm the increased glucose-dependent backbone dynamics of the active site residues and  
584 17 flexibility of the active site pocket to accommodate glucose. The gatekeeper residues selected for  
585 18 calculation was based on the symmetry of active site pocket entrance and hence were not all similar to  
586 19 the sites selected for mutagenesis. Fig. 6c highlights the increase in RMSF across residues in the  
587 20 gatekeeper and aglycone bindings site while Fig. 6d shows the increase in backbone flexibility of  
588 21 residues in the glycone binding site as well as a few residues in the gatekeeper region of the active site  
589 22 pocket. Such flexibility could enable a glucose-induced modulation of dynamic equilibrium in the  
590 23 active site pocket width. Indeed, when we compared the solvent-accessible surface area (SASA) from  
591 24 molecular dynamics simulation trajectories of the gatekeeper residues (residues 299, 314, 316, 324,  
592 25 325, 326, 410 and 411) between 0.05 M and 1.5 M glucose, we observed an increase in the distribution  
593 26 of total surface area with increasing glucose concentration (shown in Fig. 6e). The SASA for the eight  
594 27 individual residues mentioned above is shown in Fig. 6f.

603 28 **3.9. Synergy with commercial cellulase:** The synergistic effects of B8CYA8 and mutants (V169C,  
604 29 V169C/E173L, V169C/I246A, and V169C/E173L/I246A) on the model substrate Avicel was evaluated  
605 30 by assaying in the presence of the commercially available *T. viride* cellulase cocktail (Supplementary  
606 31 file, Table S5). A commercially available sweet almond  $\beta$ -glucosidase was used as a control.  
607 32 Saccharification supplementation by the triple mutant, V169C/E173L/I246A, showed a 90 % increase  
608 33 in glucose yield compared to only *T. viride* cellulase. The chosen reaction condition (pH 5 and 37 °C)

617  
618  
619 1 was optimum for only the sweet almond  $\beta$ -glucosidase and *T. viride* cellulase and in spite, the B8CYA8  
620 2 and its mutants contributed to the increased saccharification efficiencies. A further improvement in  
621 3 glucose yield upon B8CYA8 triple mutant supplementation can be expected upon use as part of a  
622 4 thermophilic cocktail optimized for activity at similar  $T_{opt}$  and  $pH_{opt}$ .

#### 625 5 **4. Discussion**

626 6 Previously we reported the role of mutations in the non-conserved residues, in the active the pocket  
627 7 of B8CYA8, V169C, and E173L, towards engineering higher catalytic efficiencies and thermal stability  
628 8 [14]. Here we investigated the effect of glucose on the catalytic efficiency of the enzyme and the role of  
629 9 the active site pocket. We observed that the specific activity of B8CYA8 on the chromogenic substrate  
630 10 *p*NPGlc increases with glucose concentration, resulting in an increase in  $k_{cat}$  and the apparent  $K_m$ . This  
631 11 increase in activity in the presence of glucose has been previously ascribed to transglycosylation [33]. Since  
632 12 we did not observe any transglycosylated products, we ruled out transglycosylation as a factor in the glucose  
633 13 tolerance of B8CYA8. Our studies with sucrose rule out osmolyte effects as a significant factor in glucose  
634 14 stimulation. Glucose has been conjectured to inhibit  $\beta$ -glucosidase by direct binding to the active site  
635 15 and compete with the substrate. The STD NMR study provided substantial evidence of the direct  
636 16 interaction of H3, H5 and H6 hydrogen of glucose with B8CYA8 residues, and together with the crystal  
637 17 structure suggest that glucose can specifically interact with the protein in the solution and bind to a  
638 18 region/subsite inside the active site pocket such that despite glucose binding to the active site, the enzyme  
639 19 is initially stimulated. It may, however, be possible that there are other low-affinity binding sites on the  
640 20 protein.

641 21 Kinetic data of B8CYA8 and its mutants in the presence of exogenously added glucose reveal the  
642 22 importance of the gatekeeper residues in glucose entry and interaction in the active site pocket. The large  
643 23 non-polar side chain of Trp, Leu, Phe, and Ile (W168, E173L, H180F, and I246) along with the strong  
644 24 hydrophobic interaction affects the entry of glucose inside the active site pocket. Conversely, polar side  
645 25 chains at the gatekeeper region (W168R, E173, and H180K) facilitate the necessary electrostatic  
646 26 interactions for the accommodation of glucose near the entrance of the pocket and competitively inhibits  
647 27 the enzyme. Residues with smaller side-chain (W168A and I246A) enable glucose entry inside the pocket,  
648 28 and in turn the inhibit enzyme activity. At the aglycone binding (+1 subsite) site, V169C specific activity  
649 29 is the highest among the mutants (1.8-fold increase in  $k_{cat}$  in the absence of glucose, compared to the WT)  
650 30 such that the addition of exogenous glucose (1 M glucose) does not increase the specific activity. The polar  
651 31 side chain probably changes the geometry of the hydrogen bonding network at the catalytic sites to facilitate  
652 32 glucose accumulation. At the glycone binding site, W122F showed increased glucose tolerance, as in the  
653 33 previously reported  $\beta$ -glucosidase (O08324) in *Thermococcus sp.*[15]. Here the indole ring of Trp probably

673  
674  
675 1 provides a geometrically complementary apolar surface for interaction with glucose, and its  $\pi$ -electron  
676 2 cloud favorably interacts with the positively charged aliphatic protons of glucose [42]. The Phe may prevent  
677 3 the accumulation of glucose near the active site from enhancing the glucose tolerance of W122F. Similar  
678 4 mutations across H0HC94 and O08324 studied in our laboratory, seems to support the role of hydrophobic  
679 5 residues inside the active site pocket [12, 22]. Amino acid residues in the aglycone-binding site have been  
680 6 proposed to be responsible for glucose tolerance [13, 43]. Based on *in-silico* docking studies, Yang et al.  
681 7 proposed that glucose tolerant  $\beta$ -glucosidase have a higher propensity of glucose binding near the middle  
682 8 of the pocket while less tolerant one can have glucose binding at the bottom [44]. The B8CYA8 crystal  
683 9 structure in the presence of glucose and STD-NMR studies, however, show the interaction with glucose  
684 10 near the bottom of the active site pocket. Glucose inhibition has been attributed to binding to other  
685 11 allosteric sites, and by non-productive binding to other sites in the active site pocket [11, 45] However  
686 12 cooperativity in B8CYA8 could not be established by measurement of hill coefficient (Supplementary file,  
687 13 Table S6) which were around one in the wild-type and the mutants. The binding of glucose to secondary  
688 14 binding site(s) is, however, yet to be experimentally proven.

695 15 The higher average temperature factor (B-factor) of glucose bound to B8CYA8 (4PTX) compared to  
696 16 the substrate or inhibitor-bound structures suggested that the addition of glucose introduces enhanced  
697 17 structural flexibility into B8CYA8. Such a trend was also confirmed upon observation of higher B-factors  
698 18 of two other glucose tolerant  $\beta$ -glucosidase structures in the presence of glucose, in comparison with the  
699 19 respective structures in the absence of glucose [33, 46, 47]. MD simulations confirmed that glucose  
700 20 increased the backbone dynamics of the gatekeeper, glycone and aglycone binding site residues and  
701 21 flexibility of the active site pocket to accommodate glucose. A flexible active site would enable a glucose-  
702 22 induced modulation of dynamic equilibrium in the active site pocket width. Indeed, the solvent-accessible  
703 23 surface area (SASA) of selected gatekeeper residues measured from molecular dynamics simulation  
704 24 trajectories at 0.05 M and 1.5 M glucose show an increase in the distribution of total surface area with  
705 25 increasing glucose concentrations. Thus, glucose may stabilize a widened active site pocket structure and  
706 26 facilitate substrate accessibility to the active site.

713 27 Previously it was reported that the addition of small amounts of glucose could reduce the non-  
714 28 productive binding of substrate to +1 and +2 subsites and stimulate enzyme activity [45]. A comparison  
715 29 with PDB structure 3F5K and 2O9P indicates the presence of the +2 subsite in B8CYA8 which can  
716 30 potentially assist in the non-productive binding of the substrate. Recently we showed that in the presence  
717 31 of low substrate concentrations (1 mM *p*NPGlc), B8CYA8 is inhibited at all concentrations of glucose  
718 32 [48]. We also reported by MD simulations of B8CYA8 in the presence of glucose that at the gatekeeper  
719 33 region, the number of glucose molecules increases significantly with glucose concentration than inside the

729  
730  
731 1 pocket [48]. Our results reported here do not preclude the possibility of substrate binding non-  
732 2 productively to the +1 to +2 subsite or the possibility of glucose binding at this subsite to relieve the non-  
733 3 productive binding of the substrate and increase enzyme activity. At higher substrate concentrations, low  
734 4 concentrations of glucose may relieve the enzyme from the non-productive binding to increase enzyme  
735 5 activity, in addition to the active site pocket widening. Thus, the process of glucose-induced pocket  
736 6 broadening and stimulation and inhibition seems to be highly dynamic and sensitive towards the ratio of  
737 7 the substrate and glucose. Fig. 7 shows our proposed model summarizing the role of hydrophobicity, size,  
738 8 and glucose on the active site pocket. In the absence of glucose, the substrate molecule dominates the  
739 9 inside of the pocket due to interactions with the hydrophilic residues and may bind to the non-productive  
740 10 binding sites inside the pocket. In the presence of high concentrations of glucose, the active site pocket  
741 11 broadens and may facilitate the accumulation of substrate and glucose inside the pocket. Active site  
742 12 pockets lined with hydrophobic residues would be expected to discourage glucose binding and therefore  
743 13 decrease the number of glucose molecules inside the active site pocket. The molecular basis of the  
744 14 glucose-induced active site pocket dynamics at different substrate concentrations is currently under  
745 15 investigation by simulating the enzyme behavior in the presence of different concentrations of substrate  
746 16 and glucose to understand this complex interplay.

747  
748  
749 17 Another essential objective of this study was to engineer improved variants of  $\beta$ -glucosidase towards  
750 18 a thermophilic cellulase cocktail. The triple mutant V169C/E173L/I246A is particularly valuable, with a  
751 19 three-fold increase in turnover number on natural substrate cellobiose ( $k_{cat} = 1065 \text{ s}^{-1}$ ), long half-life of more  
752 20 than 7 hours at 70 °C, high residual specific activity of around 75 % after a 24 h incubation in 1.0 M glucose  
753 21 at 70 °C. Our initial studies on the model substrate Avicel support the potential gains of using a high specific  
754 22 activity and glucose tolerant  $\beta$ -glucosidase [14]. We had also previously reported the potential of recycling  
755 23 the wild-type enzyme towards industrial applications [49].

756 24 In summary, we report that B8CYA8 exhibits both stimulation and inhibition by glucose that is not  
757 25 due to transglycosylation or osmolyte effects. The increase in hydrophobicity inside the active site pocket  
758 26 probably increases substrate as well as product accessibility, and the presence of high glucose  
759 27 concentrations modulate the tunnel width. While our studies do not rule out the possibility of non-  
760 28 productive substrate-binding playing a role, the dynamic modulation of the active site pocket by glucose  
761 29 and substrate seems to dictate stimulation or inhibition of enzymatic activity. Our studies reveal the role of  
762 30 non-conserved residues in the active site pocket and the benefits of engineering such residues.

763 31  
764 32 **5. Acknowledgments**

785  
786  
787 1 This work was supported in part by the Science & Engineering Research Board (SERB), Government of  
788 2 India, EMR/2016/003705 (S.D.), Energy Bioscience Overseas Fellowship, Department of Biotechnology,  
789 3 Government of India, BT/NBDB/22/06/2011 (S.D), and Academic Research Fund (IISER Kolkata) (SD,  
790 4 RD and PKG). A Senior Research Fellowship from CSIR supports SKS, and SDas was supported by an  
791 5 Inspire Fellowship, DST, Govt. India. SK is supported by an Institute Fellowship from IISER Kolkata. We  
792 6 thank Mr. Shubhasish Goswami for his initial help in cloning.  
793  
794  
795  
796  
797

## 798 8 **6. Author contributions**

799 9 SD, SKS, SDas, RD, and PKG designed the study. SKS, SDas, SK, and RD performed the study. SD, SKS,  
800 10 SDas, RD, PKG analyzed the data. SD, SKS, and RD wrote the paper.  
801  
802  
803

## 804 12 **7. Compliance with Ethical Standards**

805 13 Conflict of Interest: All authors declare that they have no conflict of interest.  
806

807 14 Ethical Approval: This article does not contain any studies with human participants or  
808 15 animals performed by any of the authors.  
809  
810  
811  
812  
813  
814  
815  
816  
817  
818  
819  
820  
821  
822  
823  
824  
825  
826  
827  
828  
829  
830  
831  
832  
833  
834  
835  
836  
837  
838  
839  
840

841  
842  
843 **1 References**  
844

- 845 2 [1] S. Datta, R. Sapa, Chapter 6 Cellulases and Hemicellulases for Biomass Degradation: An Introduction,  
846 3 in: B.A. Simmons (Ed.), Chemical and Biochemical Catalysis for Next Generation Biofuels, The Royal  
847 4 Society of Chemistry 2011, pp. 115-135.  
848 5 [2] S. Datta, Recent strategies to overexpress and engineer cellulases for biomass degradation, Current  
849 6 Metabolomics 4(1) (2016) 14-22.  
850 7 [3] S.P. Chundawat, G.T. Beckham, M.E. Himmel, B.E. Dale, Deconstruction of lignocellulosic biomass to  
851 8 fuels and chemicals, Annu Rev Chem Biomol Eng 2 (2011) 121-45.  
852 9 [4] D. Sternberg, P. Vijayakumar, E.T. Reese,  $\beta$ -Glucosidase: microbial production and effect on  
853 10 enzymatic hydrolysis of cellulose, Can. J. Microbiol. 23(2) (1977) 139-147.  
854 11 [5] C.G. Liu, N. Wang, Y.H. Lin, F.W. Bai, Very high gravity ethanol fermentation by flocculating yeast  
855 12 under redox potential-controlled conditions, Biotechnol Biofuels 5 (2012):61.  
856 13 [6] B. Guo, Y. Amano, K. Nozaki, Improvements in glucose sensitivity and stability of *Trichoderma reesei*  
857 14  $\beta$ -Glucosidase using site-directed mutagenesis, PLoS ONE 11(1) (2016) e0147301.  
858 15 [7] H. Teugjas, P. Våljamäe, Selecting  $\beta$ -glucosidases to support cellulases in cellulose saccharification,  
859 16 Biotechnol Biofuels 6(1) (2013) 105.  
860 17 [8] C.H. Li, H.R. Wang, T.R. Yan, Cloning, purification, and characterization of a heat- and alkaline-stable  
861 18 endoglucanase B from *Aspergillus niger* BCRC31494, Molecules 17(8) (2012) 9774-89.  
862 19 [9] L.-C. Cao, Z.-J. Wang, G.-H. Ren, W. Kong, L. Li, W. Xie, Y.-H. Liu, Engineering a novel glucose-tolerant  
863 20  $\beta$ -glucosidase as supplementation to enhance the hydrolysis of sugarcane bagasse at high glucose  
864 21 concentration, Biotechnol Biofuels 8 (2015) 202.  
865 22 [10] G. Li, Y. Jiang, X.J. Fan, Y.H. Liu, Molecular cloning and characterization of a novel  $\beta$ -glucosidase with  
866 23 high hydrolyzing ability for soybean isoflavone glycosides and glucose-tolerance from soil metagenomic  
867 24 library, Bioresour Technol 123 (2012) 15-22.  
868 25 [11] S.K. Sinha, S. Datta, Recent Advancements in the Engineering of  $\beta$ -Glucosidase for Biomass  
869 26 Degradation, in: A. Kumar, S. Garg (Eds.), Advances in Bio-Fuel Production, Nova Science Publishers, New  
870 27 York, 2019, pp. 235-276.  
871 28 [12] S.K. Sinha, K.P. Reddy, S. Datta, Understanding the glucose tolerance of an archaeon  $\beta$ -glucosidase  
872 29 from *Thermococcus* sp., Carbohydr Res Published Online 22 Oct 2019 (2019).  
873 30 [13] P.O. de Giuseppe, A. Souza Tde, F.H. Souza, L.M. Zanphorlin, C.B. Machado, R.J. Ward, J.A. Jorge, P.  
874 31 Furriel Rdos, M.T. Murakami, Structural basis for glucose tolerance in GH1  $\beta$ -glucosidases, Acta.  
875 32 Crystallogr. D Biol. Crystallogr. D70 (2014) 1631-1639.  
876 33 [14] S.K. Sinha, S. Goswami, S. Das, S. Datta, Exploiting non-conserved residues to improve activity and  
877 34 stability of *Halothermothrix orenii*  $\beta$ -glucosidase, Appl Microbiol Biotechnol. 101(4) (2017) 1455-1463  
878 35 [15] S.K. Sinha, S. Datta,  $\beta$ -Glucosidase from the hyperthermophilic archaeon *Thermococcus* sp. is a salt-  
879 36 tolerant enzyme that is stabilized by its reaction product glucose, Appl Microbiol Biotechnol. 100(19)  
880 37 (2016) 8399-8409.  
881 38 [16] W.-Y. Jeng, N.-C. Wang, C.-T. Lin, W.-J. Chang, C.-I. Liu, A.H.-J. Wang, High-resolution structures of  
882 39 *Neotermes koshunensis* [beta]-glucosidase mutants provide insights into the catalytic mechanism and  
883 40 the synthesis of glucoconjugates, Acta Crystallographica Section D 68(7) (2012) 829-838.  
884 41 [17] K. Mavromatis, N. Ivanova, I. Anderson, A. Lykidis, S.D. Hooper, H. Sun, V. Kunin, A. Lapidus, P.  
885 42 Hugenholtz, B. Patel, N.C. Kyrpides, Genome analysis of the anaerobic thermohalophilic bacterium  
886 43 *Halothermothrix orenii*, PLoS One 4(1) (2009) e4192.  
887  
888  
889  
890  
891  
892  
893  
894  
895  
896



- 897  
898  
899  
900 1 [18] N. Hassan, T.H. Nguyen, M. Intanon, L.D. Kori, B.K. Patel, D. Haltrich, C. Divne, T.C. Tan, Biochemical  
901 2 and structural characterization of a thermostable  $\beta$ -glucosidase from *Halothermothrix orenii* for galacto-  
902 3 oligosaccharide synthesis, *Appl Microbiol Biotechnol* 99(4) (2015) 1731-1744.  
903 4 [19] R.A. Heins, X. Cheng, S. Nath, K. Deng, B.P. Bowen, D.C. Chivian, S. Datta, G.D. Friedland, P.  
904 5 D'Haeseleer, D. Wu, M. Tran-Gyamfi, C.S. Scullin, S. Singh, W. Shi, M.G. Hamilton, M.L. Bendall, A.  
905 6 Sczyrba, J. Thompson, T. Feldman, J.M. Guenther, J.M. Gladden, J.-F. Cheng, P.D. Adams, E.M. Rubin,  
906 7 B.A. Simmons, K.L. Sale, T.R. Northen, S. Deutsch, Phylogenomically guided identification of industrially  
907 8 relevant GH1  $\beta$ -Glucosidases through DNA synthesis and Nanostructure-Initiator Mass Spectrometry,  
908 9 *ACS Chem. Biol.* 9(9) (2014) 2082-2091.  
909 10 [20] J. Brøns-Poulsen, N.E. Petersen, M. Horder, K. Kristiansen, An improved PCR-based method for site  
910 11 directed mutagenesis using megaprimers, *Mol Cell Probes* 12(6) (1998) 345-348.  
911 12 [21] M. Mayer, B. Meyer, Group epitope mapping by saturation transfer difference NMR to identify  
912 13 segments of a ligand in direct contact with a protein receptor, *J Am Chem Soc* 123(25) (2001) 6108-  
913 14 6117.  
914 15 [22] S. Goswami, N. Gupta, S. Datta, Using the  $\beta$ -glucosidase catalyzed reaction product glucose to  
915 16 improve the ionic liquid tolerance of  $\beta$ -glucosidases, *Biotechnol Biofuels* 9 (2016) 72.  
916 17 [23] W.L. Jorgensen, J. Chandrasekhar, J.D. Madura, R.W. Impey, M.L. Klein, Comparison of simple  
917 18 potential functions for simulating liquid water, *The Journal of Chemical Physics* 79(2) (1983) 926-935.  
918 19 [24] L. Martinez, R. Andrade, E.G. Birgin, J.M. Martinez, PACKMOL: a package for building initial  
919 20 configurations for molecular dynamics simulations, *J Comput Chem* 30(13) (2009) 2157-2164.  
920 21 [25] L. Kalé, R. Skeel, M. Bhandarkar, R. Brunner, A. Gursoy, N. Krawetz, J. Phillips, A. Shinozaki, K.  
921 22 Varadarajan, K. Schulten, NAMD2: Greater Scalability for Parallel Molecular Dynamics, *Journal of*  
922 23 *Computational Physics* 151(1) (1999) 283-312.  
923 24 [26] J.C. Phillips, R. Braun, W. Wang, J. Gumbart, E. Tajkhorshid, E. Villa, C. Chipot, R.D. Skeel, L. Kale, K.  
924 25 Schulten, Scalable molecular dynamics with NAMD, *J Comput Chem* 26(16) (2005) 1781-802.  
925 26 [27] B.R. Brooks, C.L. Brooks, 3rd, A.D. Mackerell, Jr., L. Nilsson, R.J. Petrella, B. Roux, Y. Won, G.  
926 27 Archontis, C. Bartels, S. Boresch, A. Cafflich, L. Caves, Q. Cui, A.R. Dinner, M. Feig, S. Fischer, J. Gao, M.  
927 28 Hodoscek, W. Im, K. Kuczera, T. Lazaridis, J. Ma, V. Ovchinnikov, E. Paci, R.W. Pastor, C.B. Post, J.Z. Pu,  
928 29 M. Schaefer, B. Tidor, R.M. Venable, H.L. Woodcock, X. Wu, W. Yang, D.M. York, M. Karplus, CHARMM:  
929 30 the biomolecular simulation program, *Journal of computational chemistry* 30(10) (2009) 1545-1614.  
930 31 [28] D.J. Evans, B.L. Holian, The Nose-Hoover thermostat, *The Journal of Chemical Physics* 83(8) (1985)  
931 32 4069-4074.  
932 33 [29] G.J. Martyna, M.L. Klein, M. Tuckerman, Nosé-Hoover chains: The canonical ensemble via  
933 34 continuous dynamics, *The Journal of Chemical Physics* 97(4) (1992) 2635-2643.  
934 35 [30] T. Darden, D. York, L. Pedersen, Particle mesh Ewald: An N-log(N) method for Ewald sums in large  
935 36 systems, *The Journal of Chemical Physics* 98(12) (1993) 10089-10092.  
936 37 [31] G.J. Martyna, D.J. Tobias, M.L. Klein, Constant pressure molecular dynamics algorithms, *The Journal*  
937 38 *of Chemical Physics* 101(5) (1994) 4177-4189.  
938 39 [32] S.E. Feller, Y. Zhang, R.W. Pastor, B.R. Brooks, Constant pressure molecular dynamics simulation:  
939 40 The Langevin piston method, *The Journal of Chemical Physics* 103(11) (1995) 4613-4621.  
940 41 [33] T. Uchiyama, K. Miyazaki, K. Yaoi, Characterization of a novel  $\beta$ -Glucosidase from a compost  
941 42 microbial metagenome with strong transglycosylation activity, *J Biol Chem* 288(25) (2013) 18325-18334.  
942 43 [34] J. Kyte, R.F. Doolittle, A simple method for displaying the hydropathic character of a protein, *J Mol*  
943 44 *Biol* 157(1) (1982) 105-132.  
944 45 [35] T.E. Creighton, *Proteins, Structures and Molecular Properties*, 2nd ed., W.H.. Freeman & Co., New  
945 46 York 1993.

- 953  
954  
955 1 [36] O.D. Monera, T.J. Sereda, N.E. Zhou, C.M. Kay, R.S. Hodges, Relationship of sidechain  
956 2 hydrophobicity and alpha-helical propensity on the stability of the single-stranded amphipathic alpha-  
957 3 helix, *J Pept Sci* 1(5) (1995) 319-29.  
958 4 [37] M. Czjzek, M. Cicek, V. Zamboni, D.R. Bevan, B. Henrissat, A. Esen, The mechanism of substrate  
959 5 (aglycone) specificity in beta -glucosidases is revealed by crystal structures of mutant maize beta -  
960 6 glucosidase-DIMBOA, -DIMBOAGlc, and -dhurrin complexes, *Proc Natl Acad Sci U S A* 97(25) (2000)  
961 7 13555-60.  
962 8 [38] S. Khan, T. Pozzo, M. Megyeri, S. Lindahl, A. Sundin, C. Turner, E.N. Karlsson, Aglycone specificity of  
963 9 *Thermotoga neapolitana* beta-glucosidase 1A modified by mutagenesis, leading to increased catalytic  
964 10 efficiency in quercetin-3-glucoside hydrolysis, *BMC biochemistry* 12 (2011) 11.  
965 11 [39] F.K. Tamaki, D.P. Souza, V.P. Souza, C.M. Ikegami, C.S. Farah, S.R. Marana, Using the Amino Acid  
966 12 Network to Modulate the Hydrolytic Activity of beta-Glycosidases, *PLoS One* 11(12) (2016) e0167978.  
967 13 [40] K. Wang, H. Luo, J. Tian, O. Turunen, H. Huang, P. Shi, H. Hua, C. Wang, S. Wang, B. Yao,  
968 14 Thermostability improvement of a streptomyces xylanase by introducing proline and glutamic acid  
969 15 residues, *Appl Environ Microbiol* 80(7) (2014) 2158-2165.  
970 16 [41] Z. Xiao, H. Bergeron, S. Grosse, M. Beauchemin, M.L. Garron, D. Shaya, T. Sulea, M. Cygler, P.C. Lau,  
971 17 Improvement of the thermostability and activity of a pectate lyase by single amino acid substitutions,  
972 18 using a strategy based on melting-temperature-guided sequence alignment, *Appl Environ Microbiol*  
973 19 74(4) (2008) 1183-1189.  
974 20 [42] W.I. Weis, K. Drickamer, Structural basis of lectin-carbohydrate recognition, *Annu Rev Biochem* 65  
975 21 (1996) 441-473.  
976 22 [43] L.M. Zanphorlin, P.O. de Giuseppe, R.V. Honorato, C.C. Tonoli, J. Fattori, E. Crespim, P.S. de Oliveira,  
977 23 R. Ruller, M.T. Murakami, Oligomerization as a strategy for cold adaptation: Structure and dynamics of  
978 24 the GH1 beta-glucosidase from *Exiguobacterium antarcticum* B7, *Sci Rep* 6 (2016) 23776.  
979 25 [44] Y. Yang, X. Zhang, Q. Yin, W. Fang, Z. Fang, X. Wang, Y. Xiao, A mechanism of glucose tolerance and  
980 26 stimulation of GH1  $\beta$ -glucosidases, *Sci Rep* 5 (2015) 17296.  
981 27 [45] S. Kuusk, P. Våljamäe, When substrate inhibits and inhibitor activates: implications of  $\beta$ -  
982 28 glucosidases, *Biotechnol Biofuels* 10 (2017) 7.  
983 29 [46] K.H. Nam, M.W. Sung, K.Y. Hwang, Structural insights into the substrate recognition properties of  $\beta$ -  
984 30 glucosidase, *Biochem Biophys Res Commun* 391(1) (2010) 1131-5.  
985 31 [47] T. Matsuzawa, T. Jo, T. Uchiyama, J.A. Manninen, T. Arakawa, K. Miyazaki, S. Fushinobu, K. Yaoi,  
986 32 Crystal structure and identification of a key amino acid for glucose tolerance, substrate specificity, and  
987 33 transglycosylation activity of metagenomic beta-glucosidase Td2F2, *Febs j* 283(12) (2016) 2340-2353.  
988 34 [48] S. Konar, S.K. Sinha, S. Datta, P.K. Ghorai, Probing the Effect of Glucose on the Activity and Stability  
989 35 of  $\beta$ -Glucosidase: An All-Atom Molecular Dynamics Simulation Investigation, *ACS Omega* 4(6) (2019)  
990 36 11189-11196.  
991 37 [49] I. Mukherjee, S.K. Sinha, S. Datta, P. De, Recyclable Thermoresponsive Polymer-beta-Glucosidase  
992 38 Conjugate with Intact Hydrolysis Activity, *Biomacromolecules* 19(6) (2018) 2286-2293.  
993 39 [50] H. McWilliam, W. Li, M. Uludag, S. Squizzato, Y.M. Park, N. Buso, A.P. Cowley, R. Lopez, Analysis  
994 40 Tool Web Services from the EMBL-EBI, *Nucleic Acids Res.* 41(Web Server issue) (2013) W597-W600.  
995 41 [51] S. Takashima, A. Nakamura, M. Hidaka, H. Masaki, T. Uozumi, Cloning, sequencing, and expression  
996 42 of the cellulase genes of *Humicola grisea* var. thermoidea, *J Biotechnol* 50(2) (1996) 137-147.  
997 43 [52] C.A. Uchima, G. Tokuda, H. Watanabe, K. Kitamoto, M. Arioka, Heterologous expression and  
998 44 characterization of a glucose-stimulated  $\beta$ -glucosidase from the termite *Neotermes kosshunensis* in  
999 45 *Aspergillus oryzae*, *Appl Microbiol Biotechnol* 89(6) (2011) 1761-1771.  
1000  
1001  
1002  
1003  
1004  
1005  
1006  
1007  
1008

1009  
1010  
1011  
1012  
1013  
1014  
1015  
1016  
1017  
1018  
1019  
1020  
1021  
1022  
1023  
1024  
1025  
1026  
1027  
1028  
1029  
1030  
1031  
1032  
1033  
1034  
1035  
1036  
1037  
1038  
1039  
1040  
1041  
1042  
1043  
1044  
1045  
1046  
1047  
1048  
1049  
1050  
1051  
1052  
1053  
1054  
1055  
1056  
1057  
1058  
1059  
1060  
1061  
1062  
1063  
1064

- 1 [53] Z. Fang, W. Fang, J. Liu, Y. Hong, H. Peng, X. Zhang, Cloning and characterization of a  $\beta$ -glucosidase  
2 from marine microbial metagenome with excellent glucose tolerance, *J Microbiol Biotechnol* 20(9)  
3 (2010) 1351-1358.  
4 [54] E.F. Pettersen, T.D. Goddard, C.C. Huang, G.S. Couch, D.M. Greenblatt, E.C. Meng, T.E. Ferrin, UCSF  
5 Chimera--a visualization system for exploratory research and analysis, *J Comput Chem* 25(13) (2004)  
6 1605-1612.

17  
18  
19  
20  
21  
22  
23  
24  
25  
26

1065  
1066  
1067 **Figure Legends**  
1068

1069 2 Figure 1. Effect of D-glucose on B8CYA8 specific activity using *p*NPGlc (20 mM) as substrate. The  
1070  
1071 3 specific activity assay details are included in the materials and methods section.  
1072

1073 4  
1074  
1075 5 Figure 2. a: Cross-section of B8CYA8 (PDB 4PTX) active site pocket is shown as a space-filling model  
1076  
1077 6 with the catalytic residues (E166 and E354), the hydrolysis product glucose, and selected gatekeeper  
1078  
1079 7 residues (amino acid residues are shown as sticks) are labeled b: 1D-NMR spectra of glucose from (i) 1D-  
1080  
1081 8 STD NMR experiment recorded with only glucose as control, (ii) reference 1D NMR spectrum of  
1082  
1083 9 glucose, (iii) 1D-STD NMR spectrum of 20 mM glucose in presence of 90  $\mu$ M B8CYA8. The  
1084  
1085 10 corresponding protons in the glucose are labeled. (iv) Chemical structure of D-glucose with the labeled  
1086  
1087 11 protons highlighted.  
1088

1089 12  
1090  
1091 13 Figure 3. a: Multiple sequence alignment of B8CYA8 against previously identified glucose tolerant GH1  
1092  
1093 14  $\beta$ -glucosidase by Clustal Omega [50]. B8CYA8 from *Halothermothrix orenii* [18] was aligned with  
1094  
1095 15 O93784 from *Humicola grisea* [51], Q8T0W7 from *Neotermes koshunensis*[52], H0HC94 from  
1096  
1097 16 *Agrobacterium tumefaciens* [22], Td2F2 from compost microbial metagenomics library [52], D5KX75  
1098  
1099 17 from a metagenome [53], O08324 from *Thermococcus sp.*[15] and A0A0F7KKB7 from metagenome [9].  
1100  
1101 18 Their UniProtKB identifies the proteins except in the case of Td2F2. b: The B8CYA8 active site pocket  
1102  
1103 19 highlighted with the residues that were probed for a possible role in catalysis and glucose tolerance. The  
1104  
1105 20 hydrophobic residues (W168, W327, and I246) are shown in dark blue, A410 and V169 by light blue,  
1106  
1107 21 H180 by orange and hydrophilic residues (E166, E173, and E354) are shown in red. E166 and E354 are  
1108  
1109 22 the catalytic acid/base and nucleophilic residues, respectively. The figure was generated using Chimera  
1110  
1111 23 1.10.1[54].

1112 24 Figure 4. The fold change in  $K_m$  amongst B8CYA8 mutants vary with an increase in glucose  
1113  
1114 25 concentration and can be binned into two groups. a) Mutants with reduced hydrophobicity and b) Mutants

1121  
1122  
1123 1 made more hydrophobic. The  $K_m$  of each mutant in the absence of glucose was normalized to 1. The  
1124 2 enzyme kinetics were determined using the substrate, *p*NPGlc. The kinetic assay details are included in  
1125 3 the materials and methods section.  
1126  
1127  
1128  
1129 4

1130  
1131 5 Figure 5. a) The fold increase in enzyme specificity ( $k_{cat}/K_m$ ) of five mutants of B8CYA8 with increasing  
1132 6 glucose concentrations, compared to wild-type. The  $k_{cat}/K_m$  of each mutant in the absence of glucose was  
1133 7 normalized to 1. b) Fold change increase in half-life (Left Y-axis) of the improved mutants at 70 °C in  
1134 8 over wild type and fold change in specific activity (Right Y-axis) under the optimum condition of each of  
1135 9 the mutants.  
1136  
1137  
1138  
1139  
1140  
1141 10

1142  
1143 11 Figure 6. The effect of glucose on protein dynamics. a) The B-factor comparison of the B8CYA8 crystal  
1144 12 structure (4PTX: B8CYA8 with glucose; 4PTV: B8CYA8 with thiocellobiose) shows the fluctuation  
1145 13 differences of residues. B8CYA8-glucose complex structure (4PTX) has higher residue fluctuations than  
1146 14 B8CYA8-thiocellobiose (4PTV) complex. b) RMSF of all B8CYA8 residues (top) at T = 335 K in the  
1147 15 presence of 0.05 M (black) and 1.5 M (red) glucose (Glc). (c) The RMSF of residues 290-340 and (d)  
1148 16 residues 400-430 highlight the increase in RMSF of gatekeeper, glycone, and aglycone binding residues  
1149 17 in the active site pocket. (e) Average SASA (solvent accessible surface area) distribution of the gate-  
1150 18 keeper residues (residues 299, 314, 316, 324, 325, 326, 410 and 411) at 335 K temperature in the presence  
1151 19 of 0.05 M and 1.5 M glucose. (f) SASA of the individual gate-keeper residues. The structures in (a) were  
1152 20 taken from the Protein Database [18]. The structures for analyses (b-f) were taken from the MD  
1153 21 simulation trajectories.  
1154  
1155  
1156  
1157  
1158  
1159  
1160  
1161  
1162  
1163  
1164  
1165  
1166  
1167  
1168  
1169  
1170  
1171  
1172  
1173  
1174  
1175  
1176

1166 23 Figure 7. Schematic of the effect of glucose on active site pocket of B8CYA8. a) Active site pocket with  
1167 24 hydrophilic residues in the gatekeeper region of the enzyme. In the absence of glucose, the substrate  
1168 25 molecule dominates the inside of the pocket due to interactions with the hydrophilic residues. b) Excess

1177  
1178  
1179 1 of glucose broadens the active site pocket and increases the accumulation of glucose inside the pocket,  
1180  
1181 2 along with more substrate and leads to competitive inhibition of the substrate. c) When the active site  
1182  
1183 3 pocket has more hydrophobic residues (by mutations at gatekeeper region or in the wild-type for glucose  
1184  
1185 4 tolerant  $\beta$ -glucosidase). d) Upon addition of glucose to the enzyme with hydrophobic residues at the  
1186  
1187 5 gatekeeper region, an excess of glucose increases the pocket width, but glucose cannot stick around inside  
1188  
1189 6 the pocket due to the greater number of hydrophobic residues and leading to an increase in glucose  
1190  
1191 7 tolerance/ decrease in glucose inhibition.

1192  
1193 8  
1194  
1195 9  
1196  
1197 10  
1198  
1199 11  
1200  
1201 12  
1202  
1203 13  
1204  
1205 14  
1206  
1207 15  
1208  
1209 16  
1210  
1211 17  
1212  
1213 18  
1214  
1215 19  
1216  
1217 20  
1218  
1219 21  
1220  
1221 22  
1222  
1223 23  
1224  
1225 24  
1226  
1227 25

1228  
1229  
1230  
1231  
1232

1 **Figure 1**

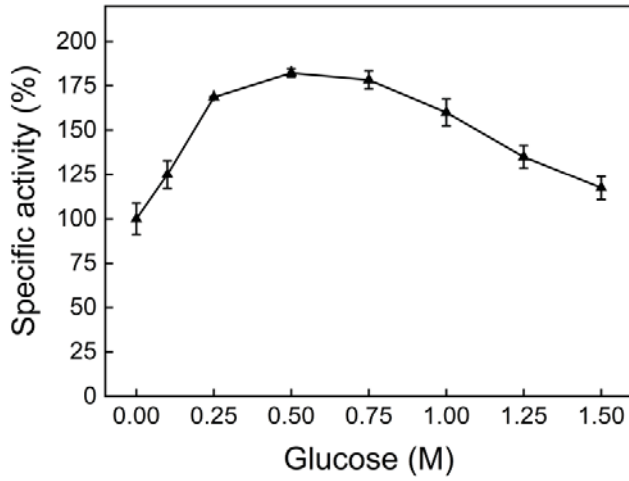

3

4

5

6

7

8

9

10

11

12

13

14

15

16

17

1 **Figure 2**

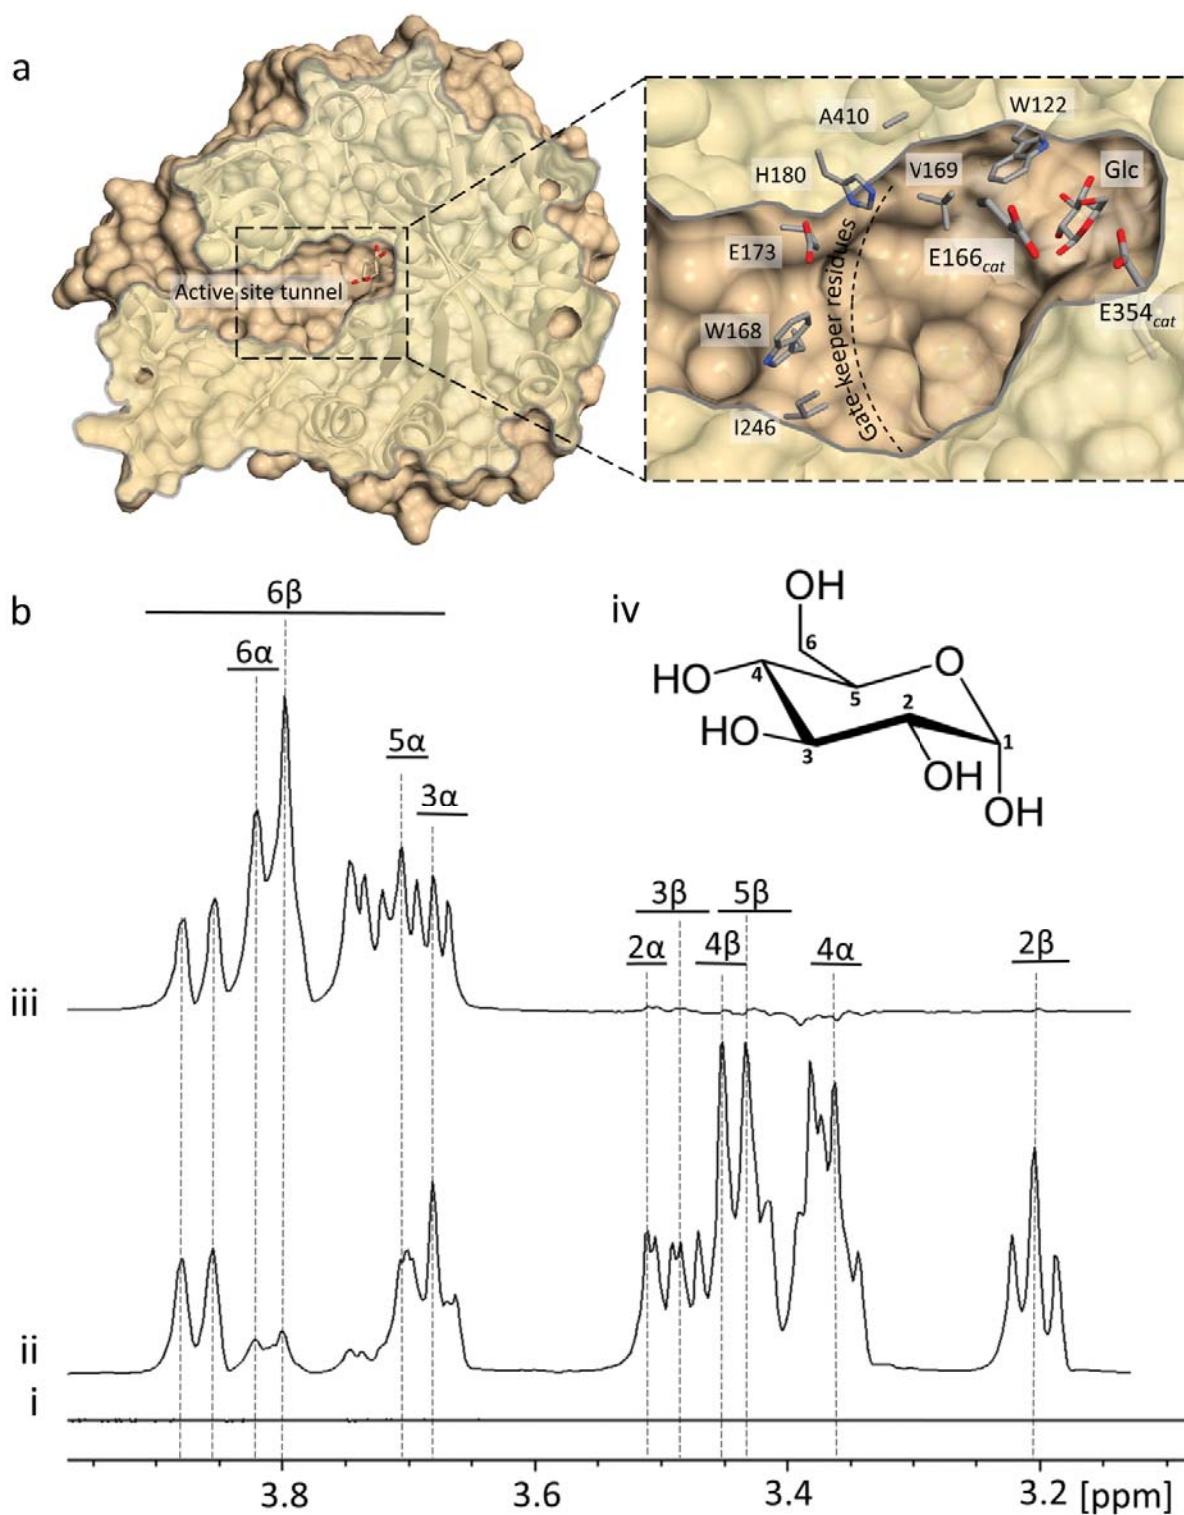



1 **Figure 3**

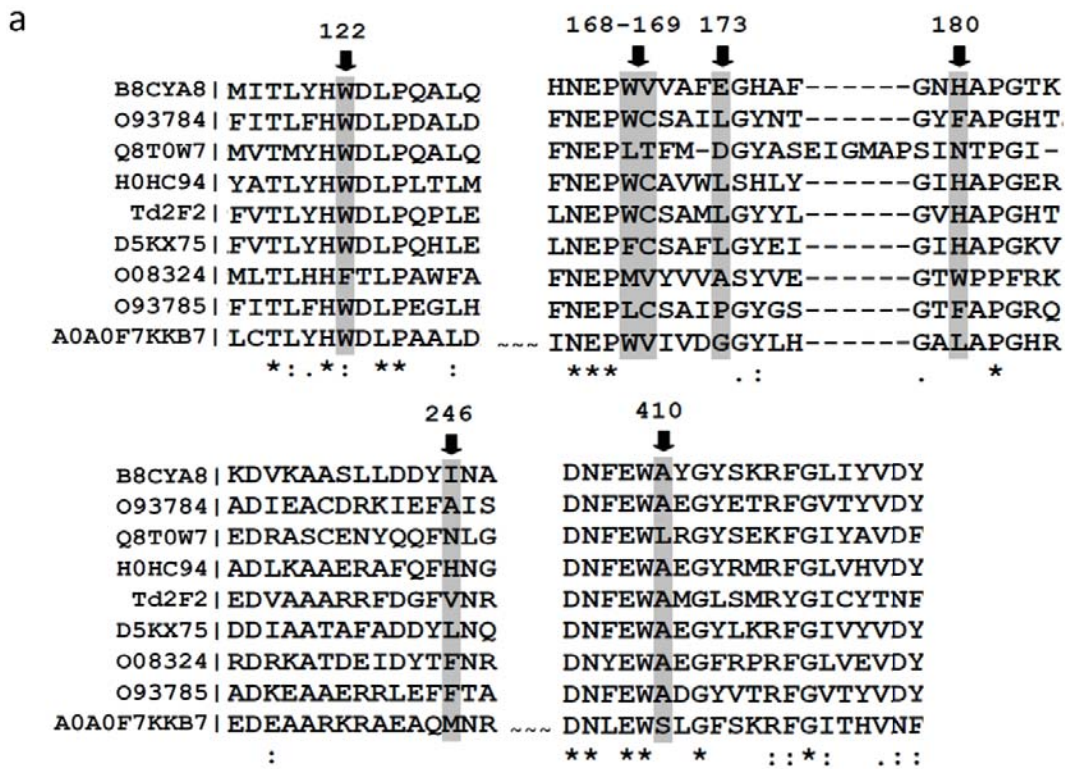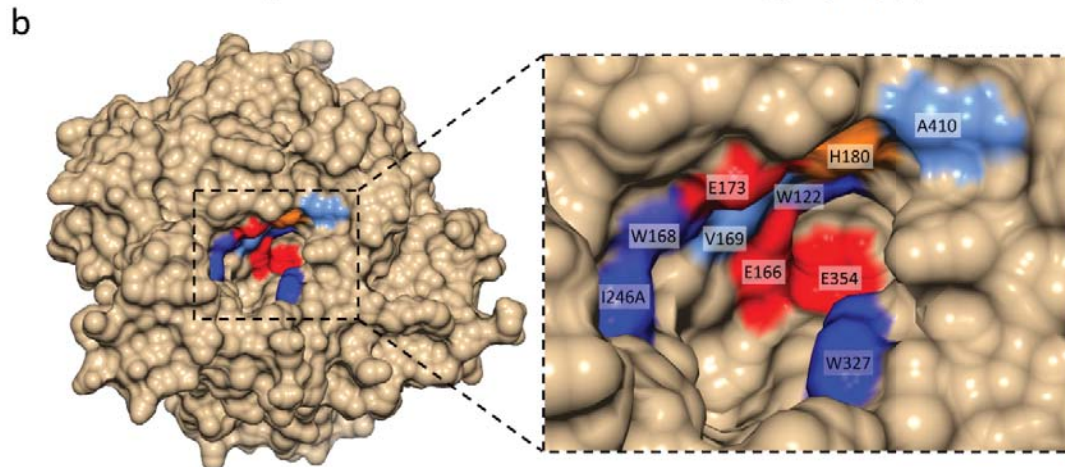

2  
3  
4  
5  
6

1401  
1402  
1403 **Figure 4**  
1404  
1405  
1406  
1407  
1408  
1409  
1410  
1411  
1412  
1413  
1414  
1415  
1416  
1417  
1418  
1419  
1420  
1421  
1422  
1423  
1424  
1425  
1426  
1427  
1428  
1429  
1430  
1431  
1432  
1433  
1434  
1435  
1436  
1437  
1438  
1439  
1440  
1441  
1442  
1443  
1444  
1445  
1446  
1447  
1448  
1449  
1450  
1451  
1452  
1453  
1454  
1455  
1456

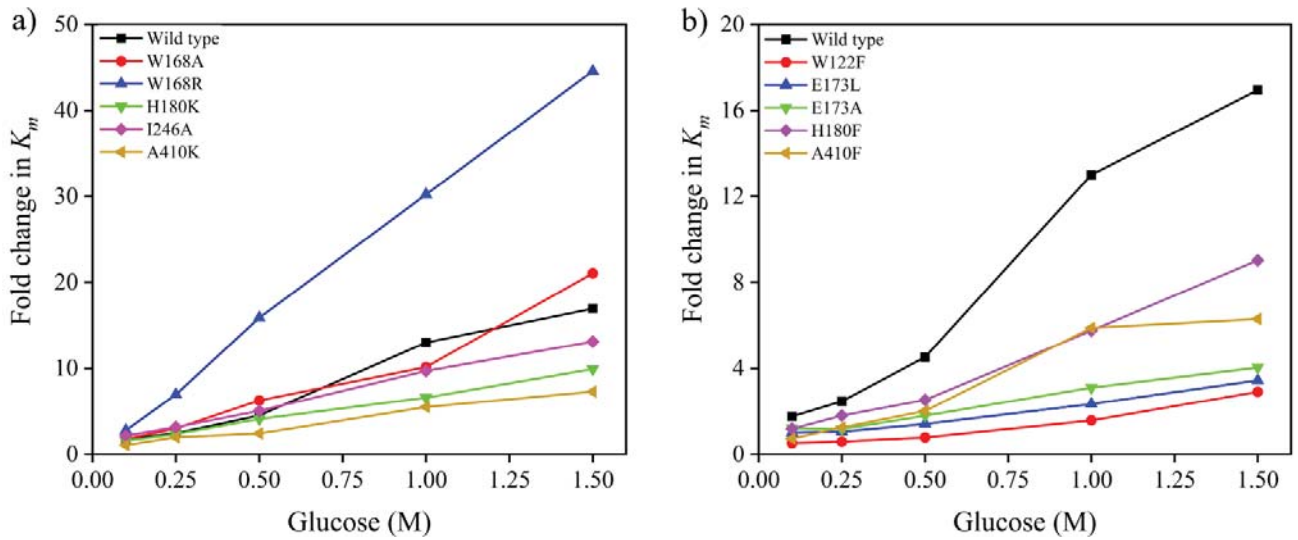

1 **Figure 5**

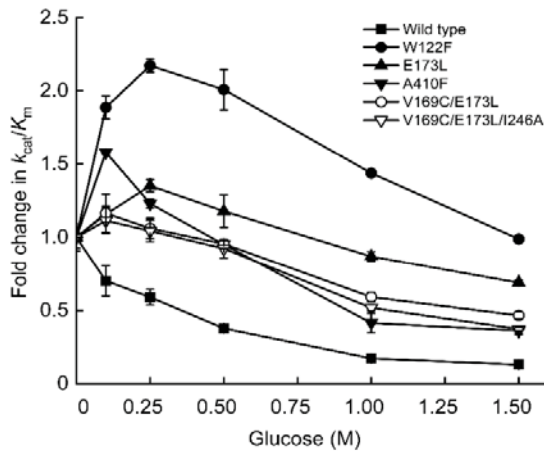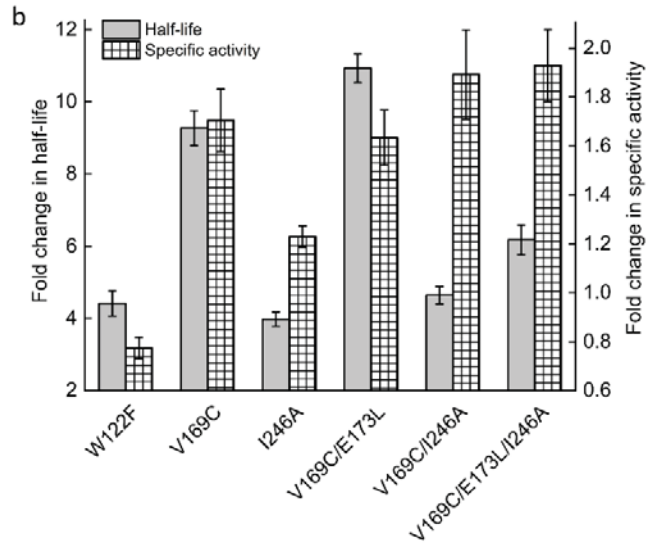

1 **Figure 6**

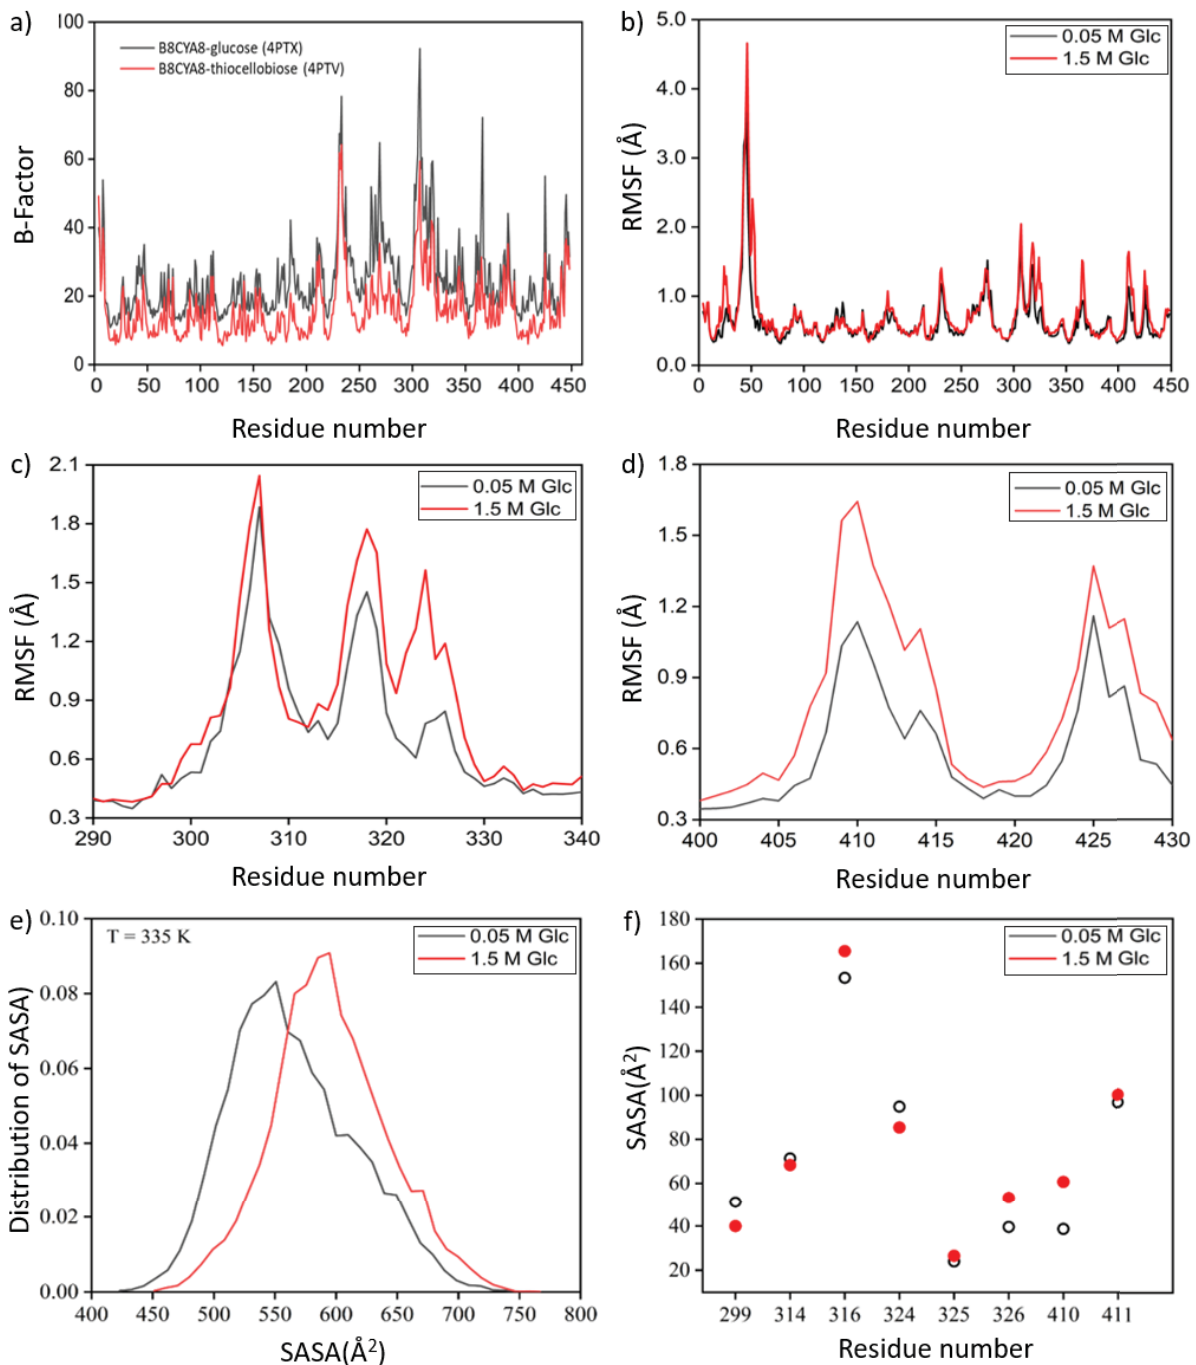

2

3

4

1 **Figure 7**

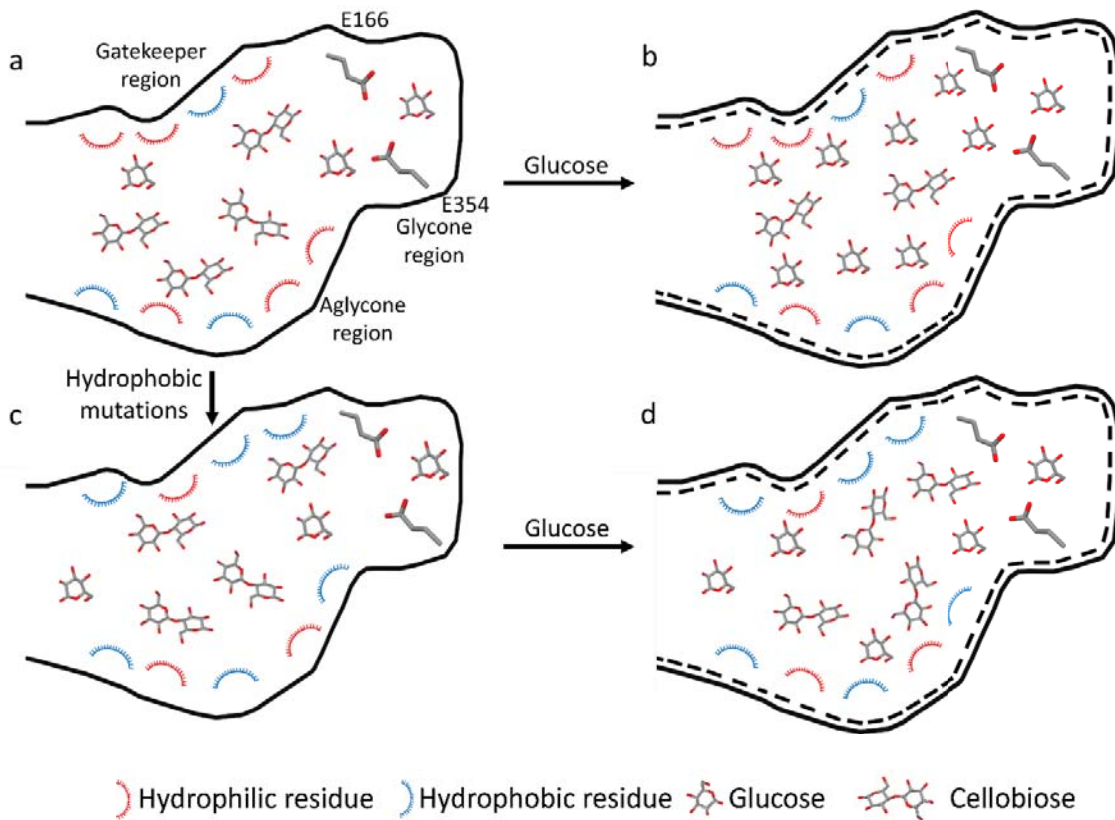

2

3

4

5

6

7

8

9

10

11

12

1 **Table 1.** Specific activity ( $\mu\text{mol}/\text{min}/\text{mg}$ ), temperature optimum,  $T_{\text{opt}}$  ( $^{\circ}\text{C}$ ) and pH optimum,  $\text{pH}_{\text{opt}}$  of  
 2 recombinant wild-type B8CYA8 (Wild-type) compared to the listed mutants on *p*-nitrophenyl-D-  
 3 glucopyranoside (*p*NPGlc) and cellobiose (Clb). For specific activity measurement saturation  
 4 concentration of substrate was used for each mutant.

| Mutants           | $\text{pH}_{\text{opt}}$ | $T_{\text{opt}}$ |     | Specific activity ( $\mu\text{mol}/\text{min}/\text{mg}$ ) |     |
|-------------------|--------------------------|------------------|-----|------------------------------------------------------------|-----|
|                   |                          | <i>p</i> NPGlc   | Clb | <i>p</i> NPGlc                                             | Clb |
| Wild-type         | 7.0                      | 70               | 65  | 345                                                        | 448 |
| W122F             | 6.5                      | 75               | 68  | 267                                                        | 124 |
| W168A             | 6.8                      | 70               | 62  | 293                                                        | 342 |
| W168R             | 6.0                      | 70               | 64  | 223                                                        | 326 |
| V169C             | 6.5                      | 73               | 68  | 588                                                        | 479 |
| E173L             | 6.8                      | 73               | 66  | 328                                                        | 398 |
| E173A             | 6.5                      | 72               | 66  | 404                                                        | 242 |
| H180F             | 6.5                      | 70               | 64  | 367                                                        | 249 |
| H180K             | 6.0                      | 70               | 64  | 161                                                        | 137 |
| I246A             | 6.5                      | 73               | 68  | 424                                                        | 443 |
| A410F             | 6.0                      | 70               | 66  | 321                                                        | 306 |
| A410K             | 6.5                      | 74               | 66  | 380                                                        | 432 |
| V169C/E173L       | 6.5                      | 74               | 68  | 564                                                        | 559 |
| V169C/I246A       | 6.0                      | 70               | 68  | 653                                                        | 712 |
| V169C/E173L/I246A | 6.0                      | 74               | 68  | 665                                                        | 918 |

1681  
1682  
1683  
1684 1 **Table 2.** Steady-state kinetic parameters of B8CYA8 (Wild-type) and mutants on cellobiose. All  
1685 2 measurements were in triplicates and repeated at least thrice.  
1686  
1687 3

| S. no. | Mutants           | $K_m$ (mM) | $k_{cat}$ (s <sup>-1</sup> ) | $k_{cat}/K_m$ (s <sup>-1</sup> mM <sup>-1</sup> ) |
|--------|-------------------|------------|------------------------------|---------------------------------------------------|
| 1      | Wild-type         | 14.7 ± 0.6 | 494 ± 46                     | 33.7 ± 1.7                                        |
| 2      | W122F             | 44.3 ± 4.2 | 137 ± 10                     | 3.1 ± 0.1                                         |
| 3      | W168A             | 27.3 ± 3.3 | 448 ± 21                     | 16.5 ± 1.2                                        |
| 4      | W168R             | 22.0 ± 0.5 | 400 ± 05                     | 18.2 ± 0.6                                        |
| 5      | V169C             | 25.3 ± 2.0 | 576 ± 37                     | 22.8 ± 0.3                                        |
| 6      | E173L             | 20.8 ± 2.2 | 507 ± 36                     | 24.4 ± 0.8                                        |
| 7      | E173A             | 11.0 ± 0.7 | 126 ± 08                     | 11.5 ± 0.6                                        |
| 8      | H180F             | 38.7 ± 3.5 | 224 ± 28                     | 5.2 ± 0.6                                         |
| 9      | H180K             | 3.8 ± 0.3  | 128 ± 05                     | 34.1 ± 2.9                                        |
| 10     | I246A             | 18.9 ± 0.9 | 515 ± 18                     | 27.3 ± 0.4                                        |
| 11     | A410F             | 42.7 ± 3.7 | 436 ± 31                     | 10.2 ± 0.6                                        |
| 12     | A410K             | 35.4 ± 2.8 | 580 ± 27                     | 16.4 ± 1.3                                        |
| 13     | V169C/E173L       | 13.6 ± 1.2 | 616 ± 45                     | 45.4 ± 3.9                                        |
| 14     | V169C/I246A       | 22.8 ± 0.8 | 886 ± 08                     | 38.9 ± 1.7                                        |
| 15     | V169C/E173L/I246A | 19.7 ± 1.6 | 1065 ± 41                    | 54.0 ± 4.1                                        |

1720  
1721 4 The  $k_{cat}$  and  $K_m$  values were determined based on the Michaelis–Menten equation, and the data fit by non-  
1722 5 linear regression analysis using GraphPad Prism.
